# Supplementary material for: Efficient red emission from poly(vinyl butyral) films doped with a novel europium complex based on a terpyridyl ancillary ligand: synthesis, structural elucidation by Sparkle/RM1 calculation, and photophysical properties
Source: Royal Society of Chemistry journal article supplement (doi:10.1039/c5py01956g), 2015-12-14
Supplement: c5py01956g1.pdf [file c5py01956g1.pdf]

## Supporting Information

### Efficient red emission from poly(vinyl butyral) films doped with a novel europium complex based terpyridyl as ancillary ligand: synthesis, structural elucidation by Sparkle/RM1 calculation, and photophysical properties

Chaolong Yang,<sup>\*ab</sup> Shaojun Liu,<sup>a</sup> Jing Xu,<sup>bc</sup> Youbing Li,<sup>a</sup> Mingyong Shang,<sup>a</sup> Lei Lei,<sup>a</sup> Guoxia Wang,<sup>a</sup> Jian He,<sup>a</sup> Xuanlun Wang,<sup>a</sup> Mangeng Lu<sup>b</sup>

<sup>a</sup> School of Materials Science and Engineering, Chongqing University of Technology, Chongqing 400054, PR China

<sup>b</sup> Key Laboratory of Polymer Materials for Electronics, Guangzhou Institute of Chemistry, Chinese Academy of Sciences, Guangzhou 510650, PR China

<sup>c</sup> Department of Chemistry, Graduate School of Science, Tohoku University, Aramaki-Azaaoba 6-3, Aoba-ku, Sendai, Japan

*\*Corresponding author E-mail: [yclzjun@163.com](mailto:yclzjun@163.com); [yclly2013@cqut.edu.cn](mailto:yclly2013@cqut.edu.cn) (CL Yang)*

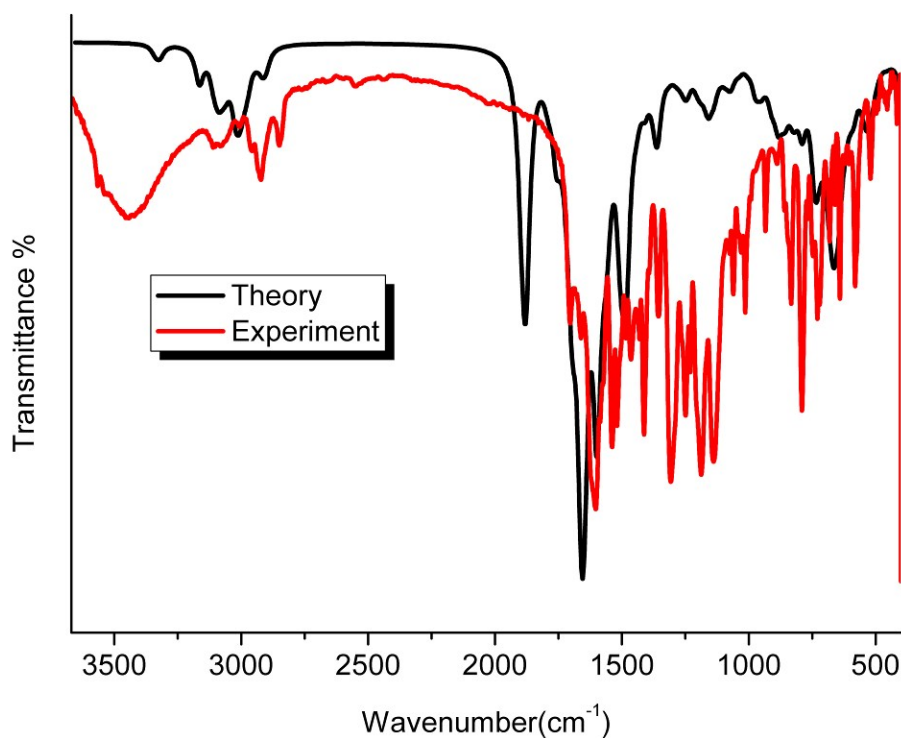

**Figure S1** The experimental and simulated FTIR spectra of  $\text{Eu}(\text{TTA})_2\text{Tpy-OCH}_3 \cdot 2\text{H}_2\text{O}$ .

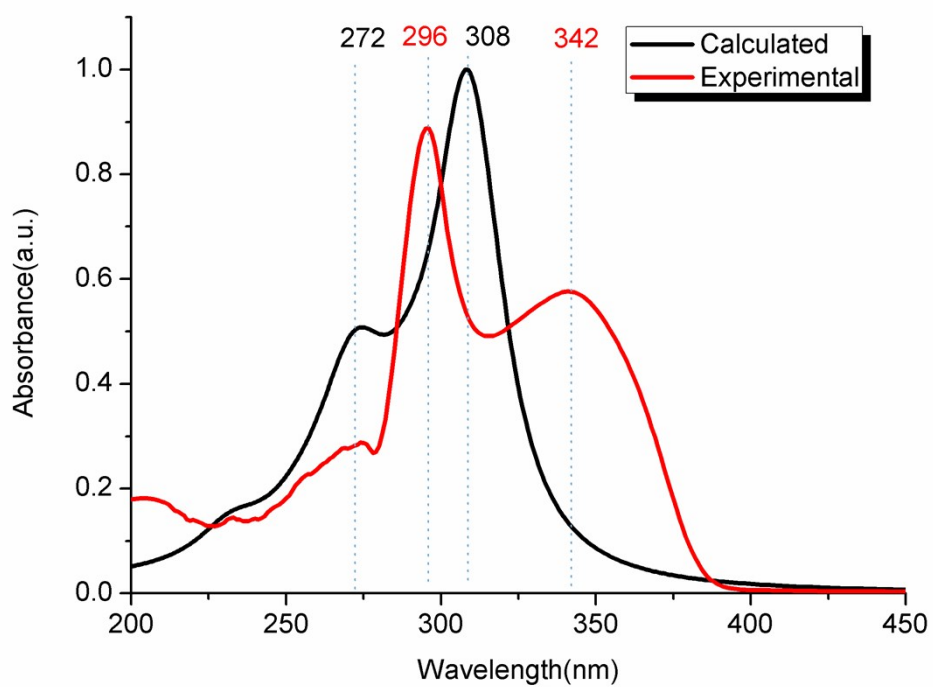

**Figure S2** The experimental and simulated UV-vis absorption of  $\text{Eu}(\text{TTA})_2\text{Tpy-OCH}_3 \cdot 2\text{H}_2\text{O}$ .

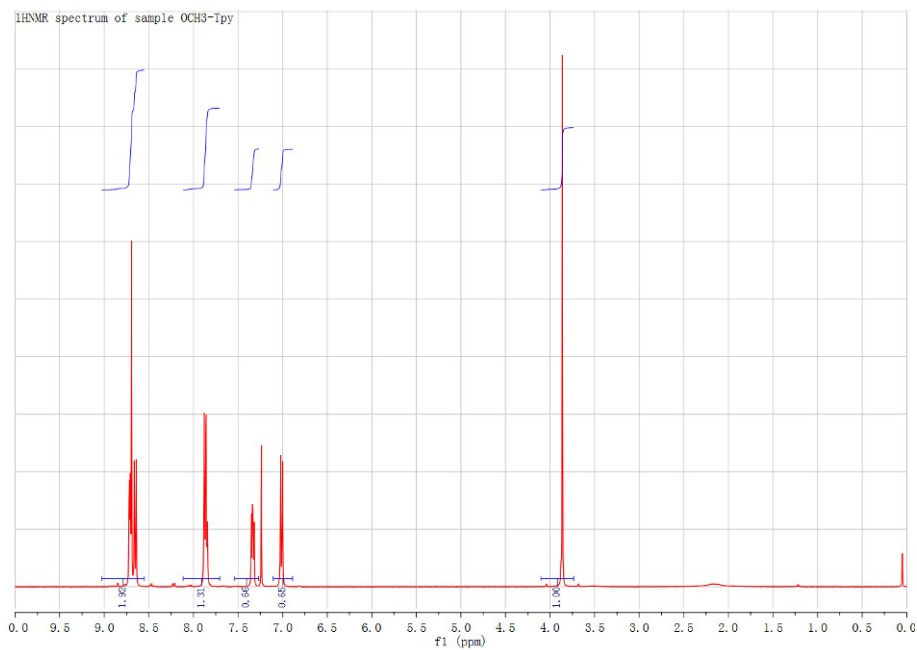

**Figure S3**  $^1\text{H}$  NMR(400 HMz) spectra of ancillary ligand  $\text{Tpy-OCH}_3$  in  $\text{CDCl}_3$ .

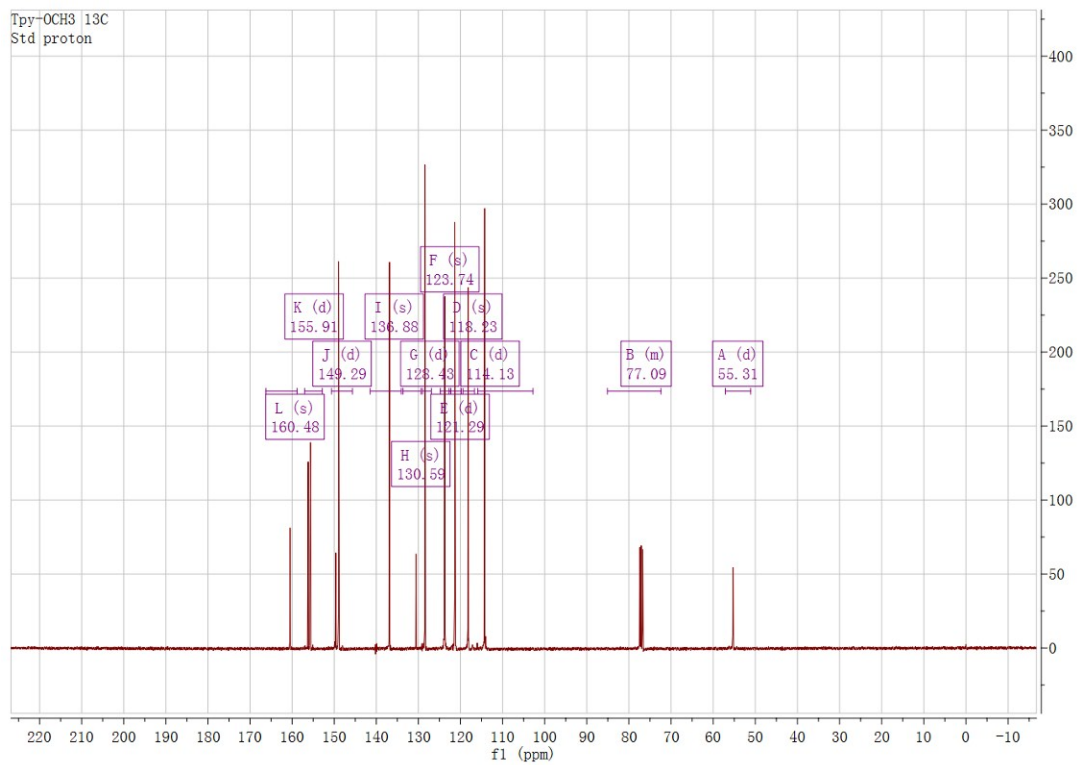

**Figure S4**  $^{13}\text{C}$  NMR(100 HMz) spectra of ancillary ligand Tpy-OCH<sub>3</sub> in CDCl<sub>3</sub>.

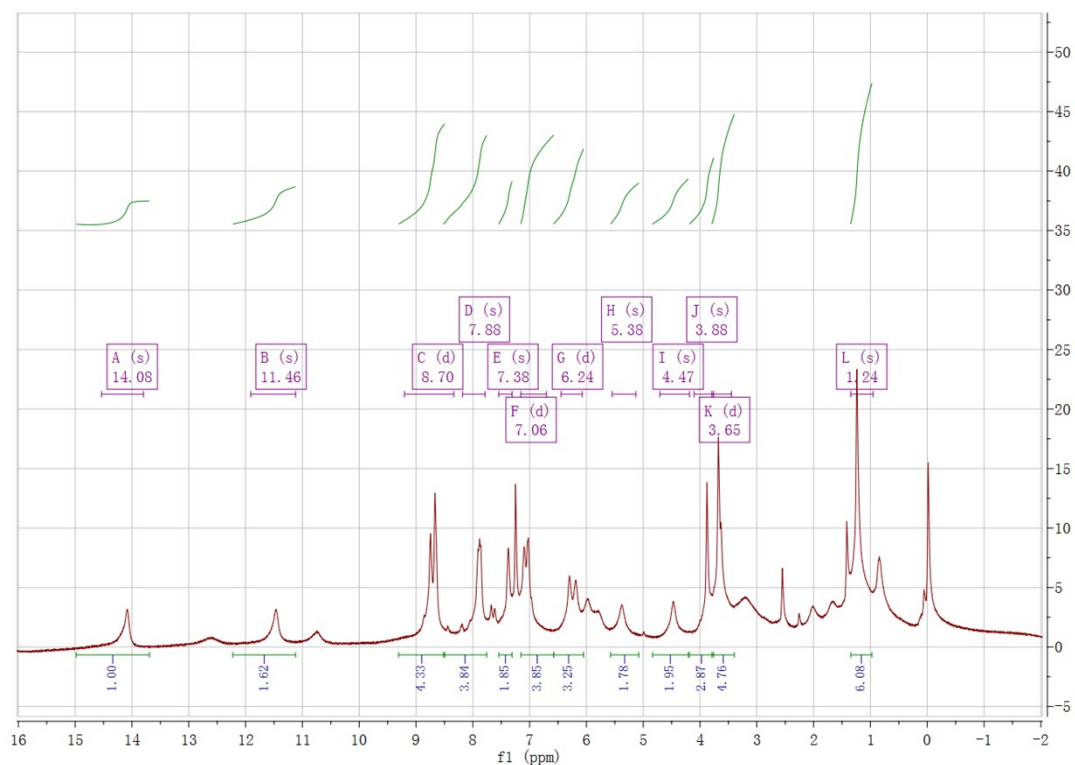

**Figure S5**  $^1\text{H}$  NMR(400 HMz) spectra of Eu(TTA)<sub>2</sub>Tpy-OCH<sub>3</sub>·2H<sub>2</sub>O in CDCl<sub>3</sub>.



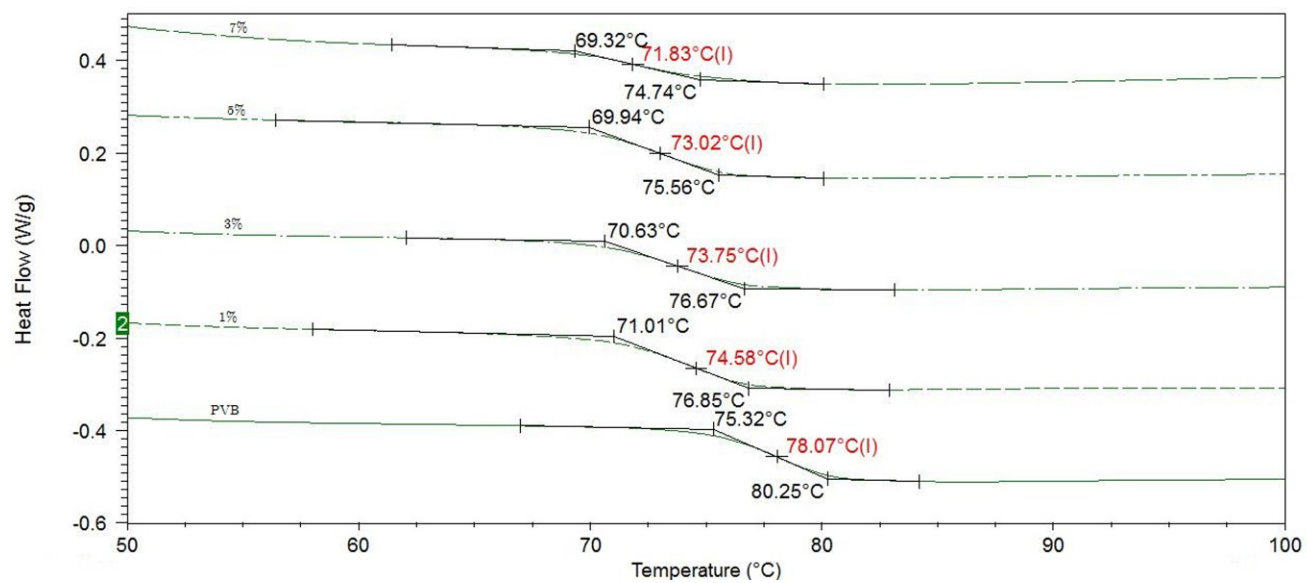

**Figure S8** DSC curves of PVB and Eu/PVB films.
